# Supplementary material for: Efficacy of brain natriuretic peptide vs. nicorandil in preventing contrast-induced nephropathy: a network meta-analysis
Source: PeerJ. 2022 Feb 23;10:e12975. doi: 10.7717/peerj.12975 (PMC8881910; doi:10.7717/peerj.12975)
Supplement: Supplemental Information 1 — Supplemental file 1 is the raw data for efficacy analysis of drug interventions on the CIN incidence and SCr level change and efficacy comparison of two kinds of the treatment course of double-dose nicorandil. In this file, we present the author name of all included studies, the number of participants, trial groups, and outcome of groups. Sheet 1: the raw datafor efficacy analysis of drug interventions on the CIN incidence; Sheet 2: the raw datafor efficacy analysis of drug interventions on the SCr level change; Sheet 3: the raw data for efficacy comparison of two kinds of treatment course of double-dose nicorandil on the CIN incidence; Sheet 4: the raw data for efficacy comparison of two kinds of the treatment course of double-dose nicorandil on the SCr level change; [file peerj-10-12975-s001.xlsx]

## Sheet: Sheet1
analysis of drug intervations for efficacy on the CIN incidence
study	study	trt	n	r		trt
Liu2014	1	1	500	72		1	intravenous saline
	1	3	500	28		2	nitroglycerin
Liu2015	2	1	106	17		3	BNP
	2	3	103	5		4	usual-dose nicorandil (15mg)
Xing2015	3	2	59	17		5	double-dose nicorandil (30mg)
	3	3	57	7
ZHANG2010	4	1	75	24
	4	3	74	12
Fan2016	5	1	120	21
	5	5	120	8
Zhang, MD2019	6	1	125	12
	6	5	125	2
Zhang2019	7	1	150	16
	7	5	150	5
Fan2019	8	1	125	19
	8	5	127	8
Iranirad2017	9	1	64	14
	9	4	64	3
Ko2013	10	1	76	5
	10	4	73	4
Nawa2015	11	1	107	16
	11	5	106	2
Zeng2019	12	1	112	16
	12	4	107	11
	12	5	111	6

## Sheet: Sheet2
analysis of drug intervations for efficacy on SCr level change
	study	treatment	mean	sd	n			treatment
Liu 2014	1	1	4.6	0.4	500			1	intravenous saline
	1	3	2.9	1.7	500			2	nitroglycerin
Liu 2015	2	1	30.7	1.2	103			3	BNP
	2	3	22.9	0.8	106			4	usual-dose nicorandil (15mg)
Sun 2015	3	1	15.9	7.35	63			5	double-dose nicorandil (30mg)
	3	3	7.52	5.57	63
Xing 2015	4	2	20.27	1.04	59
	4	3	18.26	1.63	57
Zhang 2010	5	1	24.12	10.89	75
	5	3	12.72	10.35	74
Fan2016	6	1	26.79	7.33	120
	6	5	21.18	7.3	120
Fan2019	7	1	18.44	4	125
	7	5	8.65	3.43	127
Ko2013	8	1	-0.03	0.12	76
	8	4	-0.05	0.18	73
Nawa2015	9	1	3.33	0.11	107
	9	4	0.6	0.09	106
Zeng2019	10	1	13.25	8.25	112
	10	4	9.2	1.69	107
	10	5	3.95	2.77	111
Zhang2019	11	1	16.32	1.79	150
	11	5	5.12	-0.3	150

## Sheet: Sheet3
analysis of two kinds of treatment course of 30mg nicorandil for efficacy on CIN incidence
study	study	trt	n	t		trt
Fan2016	1	1	120	21		1	intravenous saline
	1	3	120	8		2	≤24h course
Zhang, MD2019	2	1	125	12		3	4-5 days course
	2	2	125	2
Zhang2019	3	1	150	16
	3	2	150	5
Fan2019	4	1	125	19
	4	3	127	8
Nawa2015	5	1	107	16
	5	2	106	2
Zeng2019	6	1	112	16
	6	2	111	6

## Sheet: Sheet4
analysis of two kinds of treatment course of 30mg nicorandil for efficacy on SCr level change
	study	treatment	mean	sd	n		treatment
Fan2016	1	1	26.79	7.33	120		1	intravenous saline
	1	3	21.18	7.3	120		2	≤24h course
Fan2019	2	1	18.44	4	125		3	4-5 days course
	2	3	8.65	3.43	127
Zeng2019	3	1	13.25	8.25	112
	3	2	3.95	2.77	111
Zhang2019	4	1	16.32	1.79	150
	4	2	5.12	-0.3	150
